# Supplementary material for: Multi-trait meta-analyses reveal 25 quantitative trait loci for economically important traits in Brown Swiss cattle
Source: bioRxiv or medRxiv preprint supplement (doi:10.1101/517276), 2019-01-25
Supplement: Supplementary file [file media-1.pdf]

**Table S1 Number of Brown Swiss bulls for 56 economically important traits and their classification.**

| Trait type               | Trait name               | N of Animal |                 |
|--------------------------|--------------------------|-------------|-----------------|
|                          |                          | Swiss       | Austrian-German |
| Milk production          | Milk yield               | 1874        | 2497            |
|                          | Fat yield                | 1874        | 2497            |
|                          | Protein yield            | 1874        | 2497            |
|                          | Fat percentage           | 1874        | 2497            |
|                          | Protein percentage       | 1874        | 2497            |
| Body Size                | Stature                  | 1875        | 2389            |
|                          | Chest width              | 1873        | 2279            |
|                          | Body Depth               | 1874        | 2389            |
|                          | Angularity               | 1871        | 2381            |
|                          | Rump length              | 1874        | 2181            |
|                          | Rump width               | 1874        | 2387            |
|                          | Rump angle               | 1874        | 2389            |
|                          | Thurl position           | 1872        | 1443            |
|                          | Backline                 | 1864        | 2387            |
|                          | Overall frame            | 1867        | 2182            |
|                          | Overall rump             | 1850        | 1443            |
|                          | Final conformation Score | 1861        | 1414            |
| Leg conformation         | Hock angularity          | 1866        | 2389            |
|                          | Hock development         | 1862        | 2387            |
|                          | Foot angle               | 1850        | 2389            |
|                          | Hoof height              | 1837        | 2386            |
|                          | Overall leg conformation | 1854        | 2382            |
| Mammary gland morphology | Fore udder length        | 1865        | 2387            |
|                          | Rear udder width         | 1863        | 2389            |
|                          | Rear udder height        | 1865        | 2389            |
|                          | Suspension ligament      | 1861        | 2389            |
|                          | Udder depth              | 1872        | 2389            |
|                          | Fore udder attachment    | 1866        | 1384            |
|                          | Udder balance            | 1865        | 1341            |
|                          | Teat length              | 1872        | 2389            |
|                          | Teat thickness           | 1872        | 1369            |
|                          | Teat placement (front)   | 1872        | 2156            |
|                          | Teat placement (rear)    | 1871        | NA              |
|                          | Teat direction (rear)    | 1870        | 2387            |
|                          | Udder cleanness          | NA          | 2381            |
|                          | Overall udder score      | 1861        | 2384            |

**Table S1 Number of Brown Swiss bulls for 56 economically important traits and their classification (continued).**

| Trait type                 | Trait name                                        | N of Animal  |                 |
|----------------------------|---------------------------------------------------|--------------|-----------------|
|                            |                                                   | Swiss        | Austrian-German |
| Fertility                  | Non-return rate (heifer)                          | 1811         | NA              |
|                            | Non-return rate (cow)                             | 1836         | NA              |
|                            | Interval from first to last insemination (heifer) | 1801         | NA              |
|                            | Interval from first to last insemination (cow)    | 1820         | NA              |
|                            | Days to first service                             | 1809         | NA              |
| Calving                    | Direct / maternal calving ease                    | 1632 / 1532  | 2530/2526       |
|                            | Direct / maternal birth weight                    | 1639 / 1747  | NA              |
|                            | Direct / maternal gestation length                | 1768 / 1776  | NA              |
|                            | Direct live birth                                 | 1068         | NA              |
| Growth and carcass quality | Daily net gain                                    | 1470         | 2529            |
|                            | Carcass percentage                                | NA           | 2460            |
|                            | Carcass grading                                   | 1450 (CHATX) | 2527 (EUROP)    |
|                            | Daily net gain (calf)                             | 1527         | NA              |
|                            | Carcass grading (calf)                            | 1480 (CHATX) | NA              |
|                            | Milking speed                                     | 1846         | 2517            |
|                            | Longevity                                         | 1805         | 2529            |
|                            | Persistency                                       | 1868         | 2530            |
|                            | Somatic cell score                                | 1861         | 2517            |
