# Supplementary material for: Multi-trait meta-analyses reveal 25 quantitative trait loci for economically important traits in Brown Swiss cattle
Source: bioRxiv or medRxiv preprint supplement (doi:10.1101/517276), 2019-01-25

### Calving

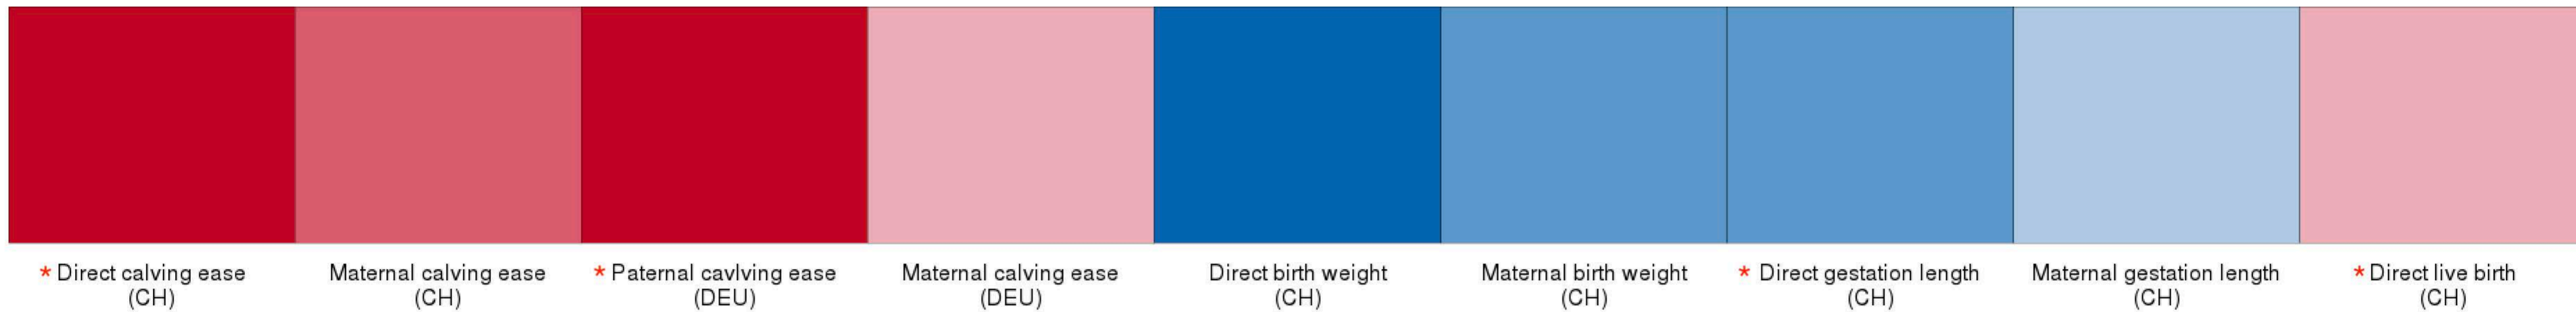

### Body size

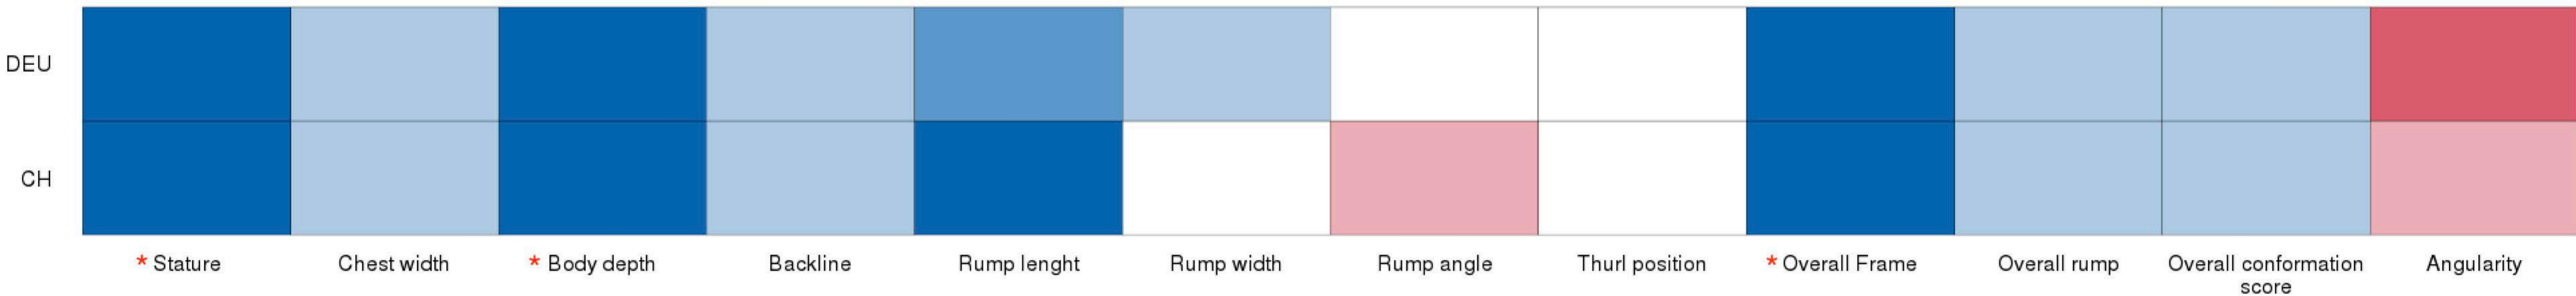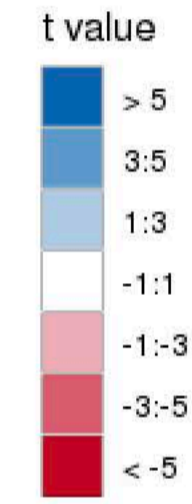

### Leg conformation

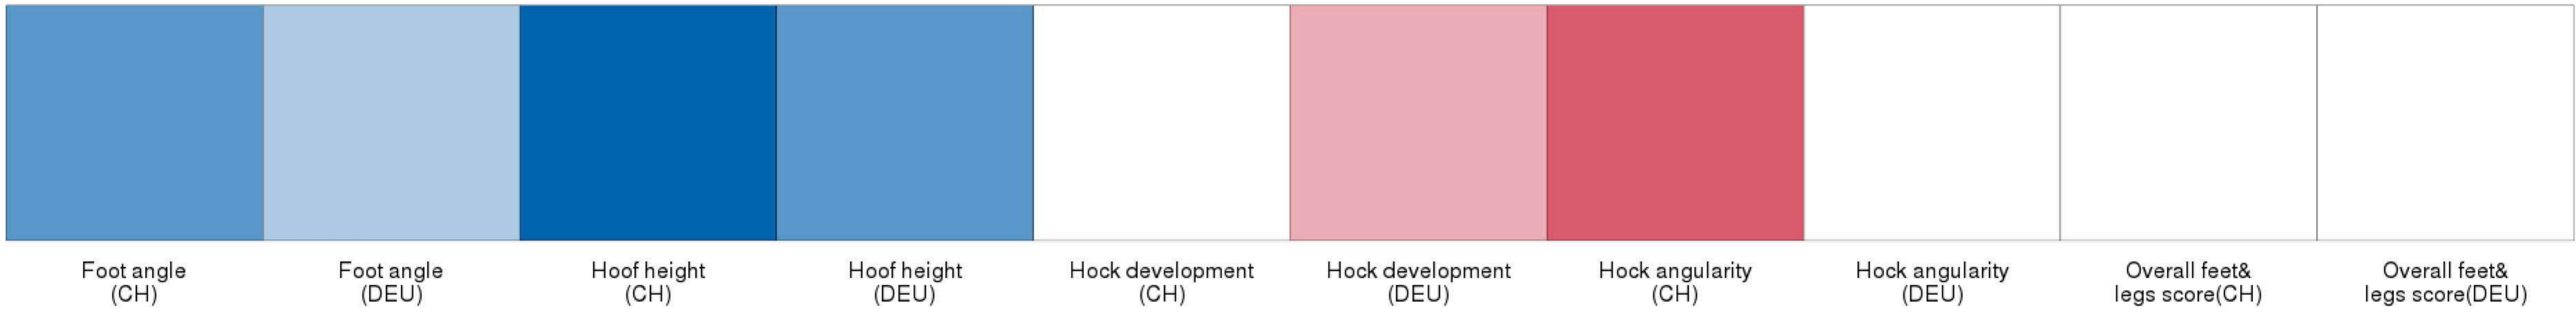

### Mammary gland morphology

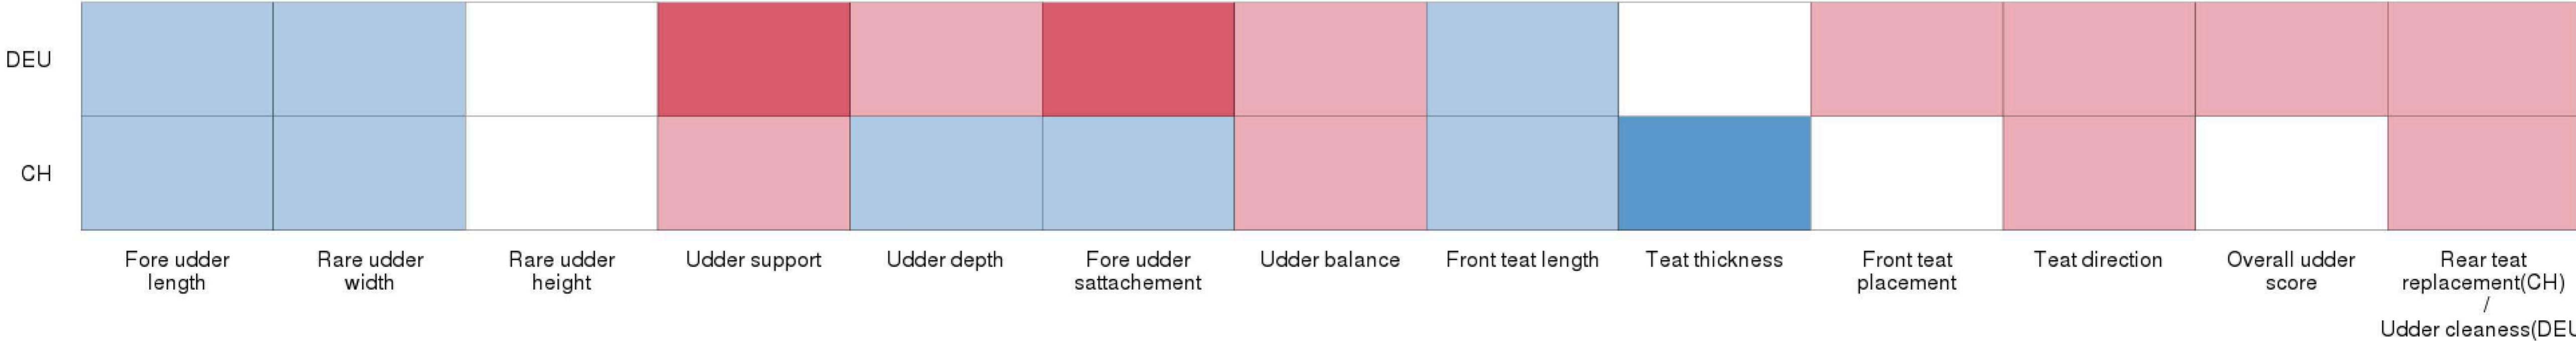

Supplement: Supplementary file [file media-5.pdf]
